1 **Title: Population clustering of structural brain aging and its association with**  
2 **brain development**

3

4 **Authors:** Haojing Duan<sup>1,2</sup>, Runye Shi<sup>3</sup>, Jujiao Kang<sup>1,2</sup>, Tobias Banaschewski<sup>4</sup>, Arun L. W.  
5 Bokde<sup>5</sup>, Christian Büchel<sup>6</sup>, Sylvane Desrivieres<sup>7</sup>, Herta Flor<sup>8,9</sup>, Antoine Grigis<sup>10</sup>, Hugh  
6 Garavan<sup>11</sup>, Penny A. Gowland<sup>12</sup>, Andreas Heinz<sup>13</sup>, Rüdiger Brühl<sup>14</sup>, Jean-Luc Martinot<sup>15,16</sup>,  
7 Marie-Laure Paillère Martinot<sup>15,17</sup>, Eric Artiges<sup>15,16</sup>, Frauke Nees<sup>4,8,18</sup>, Dimitri Papadopoulos  
8 Orfanos<sup>10</sup>, Luise Poustka<sup>19</sup>, Sarah Hohmann<sup>4</sup>, Nathalie Holz<sup>4</sup>, Juliane H. Fröhner<sup>20</sup>, Michael  
9 N. Smolka<sup>20</sup>, Nilakshi Vaidya<sup>21</sup>, Henrik Walter<sup>13</sup>, Robert Whelan<sup>22</sup>, Gunter  
10 Schumann<sup>1,21,23,24</sup>, Xiaolei Lin<sup>3,25\*</sup>, Jianfeng Feng<sup>1,2,3,26,27,28\*</sup>, IMAGEN consortium

11 **Affiliations:**

12 <sup>1</sup> Institute of Science and Technology for Brain-Inspired Intelligence, Fudan University, Shanghai, China

13 <sup>2</sup> Key Laboratory of Computational Neuroscience and Brain-Inspired Intelligence (Fudan University),  
14 Ministry of Education, China

15 <sup>3</sup> School of Data Science, Fudan University, Shanghai, China

16 <sup>4</sup> Department of Child and Adolescent Psychiatry and Psychotherapy, Central Institute of Mental Health,  
17 Medical Faculty Mannheim, Heidelberg University, Square J5, 68159 Mannheim, Germany

18 <sup>5</sup> Discipline of Psychiatry, School of Medicine and Trinity College Institute of Neuroscience, Trinity  
19 College Dublin, Dublin, Ireland

20 <sup>6</sup> University Medical Centre Hamburg-Eppendorf, Hamburg, Germany

21 <sup>7</sup> Social Genetic and Developmental Psychiatry Centre, Institute of Psychiatry, Psychology and  
22 Neuroscience, King's College London, London, UK

23 <sup>8</sup> Institute of Cognitive and Clinical Neuroscience, Central Institute of Mental Health, Medical Faculty  
24 Mannheim, Heidelberg University, Square J5, Mannheim, Germany

25 <sup>9</sup> Department of Psychology, School of Social Sciences, University of Mannheim, 68131 Mannheim,  
26 Germany

27 <sup>10</sup> NeuroSpin, CEA, Université Paris-Saclay, F-91191 Gif-sur-Yvette, France

28 <sup>11</sup> Departments of Psychiatry and Psychology, University of Vermont, 05405 Burlington, Vermont, USA

29 <sup>12</sup> Sir Peter Mansfield Imaging Centre School of Physics and Astronomy, University of Nottingham,  
30 University Park, Nottingham, United Kingdom

31 <sup>13</sup> Department of Psychiatry and Psychotherapy CCM, Charité – Universitätsmedizin Berlin, corporate  
32 member of Freie Universität Berlin, Humboldt-Universität zu Berlin, and Berlin Institute of Health, Berlin,  
33 Germany

34 <sup>14</sup> Physikalisch-Technische Bundesanstalt (PTB), Braunschweig and Berlin, Germany

35 <sup>15</sup> Institut National de la Santé et de la Recherche Médicale, INSERM U1299 "Developmental Trajectories  
36 and Psychiatry", Université Paris-Saclay, Ecole Normale supérieure Paris-Saclay, CNRS, Centre Borelli,  
37 Gif-sur-Yvette, France

38 <sup>16</sup> Psychiatry Department, EPS Barthélémy Durand, Etampes; France

39 <sup>17</sup> AP-HP. Sorbonne Université, Department of Child and Adolescent Psychiatry, Pitié-Salpêtrière  
40 Hospital, Paris, France

41 <sup>18</sup> Institute of Medical Psychology and Medical Sociology, University Medical Center Schleswig-Holstein  
42 Kiel University, Kiel, Germany

43 <sup>19</sup> **NOTE:** This preprint reports new research that has not been certified by peer review and should not be used to guide clinical practice.  
Department of Child and Adolescent Psychiatry and Psychotherapy, University Medical Centre

44 Göttingen, von-Siebold-Str. 5, 37075, Göttingen, Germany

45 <sup>20</sup> Department of Psychiatry and Neuroimaging Center, Technische Universität Dresden, Dresden,  
46 Germany

47 <sup>21</sup> Department of Psychiatry and Neurosciences, Charité–Universitätsmedizin Berlin, corporate member of  
48 Freie Universität BerlinHumboldt-Universität zu Berlin, and Berlin Institute of Health, Berlin, Germany

49 <sup>22</sup> School of Psychology and Global Brain Health Institute, Trinity College Dublin, Ireland

50 <sup>23</sup> Centre for Population Neuroscience and Stratified Medicine (PONS Centre), ISTBI, Fudan University,  
51 Shanghai, China

52 <sup>24</sup> Centre for Population Neuroscience and Stratified Medicine (PONS), Department of Psychiatry and  
53 Psychotherapy, Charité Universitätsmedizin Berlin, Germany

54 <sup>25</sup> Huashan Institute of Medicine, Huashan Hospital affiliated to Fudan University, Shanghai, China

55 <sup>26</sup> MOE Frontiers Center for Brain Science, Fudan University, Shanghai, China

56 <sup>27</sup> Zhangjiang Fudan International Innovation Center, Shanghai, China

57 <sup>28</sup> Department of Computer Science, University of Warwick, Coventry CV4 7AL, UK

58

59 \* Correspondence authors.

60 Xiaolei Lin (Address: School of Data Science, Fudan University, Shanghai, 200433, China. Email:  
61 [xiaoleilin@fudan.edu.cn](mailto:xiaoleilin@fudan.edu.cn))

62 or

63 Jianfeng Feng (Address: Institute of Science and Technology for Brain-inspired Intelligence, Fudan  
64 University, Shanghai, 200433, China. Email: [jianfeng64@gmail.com](mailto:jianfeng64@gmail.com))

65 **Abstract**

66 Structural brain aging has demonstrated strong inter-individual heterogeneity and mirroring  
67 patterns with brain development. However, due to the lack of large-scale longitudinal  
68 neuroimaging studies, most of the existing research focused on the cross-sectional changes of  
69 brain aging. In this investigation, we present a data-driven approach that incorporate both cross-  
70 sectional changes and longitudinal trajectories of structural brain aging and identified two brain  
71 aging patterns among 37,013 healthy participants from UK Biobank. Participants with  
72 accelerated brain aging also demonstrated accelerated biological aging, cognitive decline and  
73 increased genetic susceptibilities to major neuropsychiatric disorders. Further, by integrating  
74 longitudinal neuroimaging studies from a multi-center adolescent cohort, we validated the “last  
75 in, first out” mirroring hypothesis and identified brain regions with manifested mirroring  
76 patterns between brain aging and brain development. Genomic analyses revealed risk loci and  
77 genes contributing to accelerated brain aging and delayed brain development, providing  
78 molecular basis for elucidating the biological mechanisms underlying brain aging and related  
79 disorders.

## 80 **Introduction**

81 The structure of the brain undergoes continual changes throughout the entire lifespan, with  
82 structural brain alterations intimately linking brain development and brain aging<sup>1,2</sup>. Brain aging  
83 is a progressive process that often co-occurs with biological aging and declines of cognitive  
84 functions<sup>3-5</sup>, which contribute to the onset and acceleration of neurodegenerative<sup>6</sup> and  
85 neuropsychiatric disorders<sup>7</sup>. Studies on healthy brain aging have revealed significant inter-  
86 individual heterogeneity in the patterns of neuroanatomical changes<sup>8,9</sup>. Therefore, examining  
87 the patterns of structural brain aging and its associations with cognitive decline is of paramount  
88 importance in understanding the diverse biological mechanisms of age-related  
89 neuropsychiatric disorders.

90 Despite the fact that there exist large differences between brain development and brain  
91 aging<sup>10</sup>, a discernible association between these two processes remains evident. Direct  
92 comparisons of brain development and brain aging using structural MRI indicated a “last in,  
93 first out” mirroring pattern, where brain regions develop relatively late during adolescence  
94 demonstrated accelerated degeneration in older ages<sup>11,12</sup>. In addition, brain regions with strong  
95 mirroring effects showed increased vulnerability to neurodegenerative and neuropsychiatric  
96 disorders, including Alzheimer’s disease and schizophrenia<sup>13</sup>. However, due to the lack of  
97 large-scale longitudinal MRI studies during adolescence and mid-to-late adulthood, validation  
98 of the “last in, first out” mirroring hypothesis remains unavailable.

99 Prior investigations have largely focused on regional and cross-sectional changes of brain  
100 aging<sup>9,13,14</sup>, with relatively few studies exploring longitudinal trajectories of brain aging and its  
101 associations with brain development<sup>8,15,16</sup>. In this article, we present a data-driven approach to  
102 examine the population clustering of longitudinal brain aging trajectories using structure MRI  
103 data obtained from 37,013 healthy individuals during mid-to-late adulthood (44-82 years), and  
104 explore its association with biological aging, cognitive decline and susceptibilities for  
105 neuropsychiatric disorders. Further, mirroring patterns between longitudinal brain  
106 development and brain aging are investigated by comparing the region-specific aging /  
107 developmental trajectories, and manifestation of the mirroring patterns are investigated across  
108 the whole-brain and among participants with different brain aging patterns. Genomic analyses

109 are conducted to reveal risk loci and genes associated with accelerated brain aging and delayed  
110 brain development.

111

## 112 **Results**

### 113 **Longitudinal trajectories of whole-brain gray matter volume in mid-to-late adulthood** 114 **define two brain aging patterns.**

115 Figure 1 provides the data sources, analytical workflow and research methodology of this study.  
116 After the sample selection process (Appendix 1—figure 1, Appendix 1—tables 1 and 2),  
117 longitudinal grey matter volume (GMV) trajectories in 40 ROIs (33 cortical and 7 subcortical  
118 ROIs, see Appendix 1—table 3) were estimated for each of the 37,013 healthy participants in  
119 UK Biobank. The first 15 principal components derived from dimensionality reduction via  
120 principal component analysis were used in the clustering analysis (see Methods)<sup>17,18</sup>. Two brain  
121 aging patterns were identified, where 18,929 (51.1%) participants with the first brain aging  
122 pattern (pattern 1) had higher total GMV at baseline and a slower rate of GMV decrease over  
123 time, and the remaining participants with the second pattern (pattern 2) had lower total GMV  
124 at baseline and a faster rate of GMV decrease (Figure 2a). Comparing the region-specific rate  
125 of GMV decrease, pattern 2 showed a more rapid GMV decrease in medial occipital (lingual  
126 gyrus, cuneus and pericalcarine cortex) and medial temporal (entorhinal cortex,  
127 parahippocampal gyrus) regions (Figure 2b, c and Appendix 1—figure 2), which had the largest  
128 loadings in the second and third principal components (Appendix 1—table 4). These two  
129 patterns can be clearly stratified by both linear and non-linear dimensionality reduction  
130 methods, indicating distinct structural differences in brain aging between patterns (Appendix  
131 1—figure 3). Sample characteristics of these 37,013 UK Biobank participants stratified by  
132 brain aging patterns are summarized in Appendix 1—table 5. Overall, participants with  
133 different brain aging patterns had similar distributions with regard to age, sex, ethnicity,  
134 smoking status, Townsend deprivation index (TDI), body mass index (BMI) and years of  
135 schooling.

136

137 **Brain aging patterns were significantly associated with biological aging.**

138 To explore the relationships between structural brain aging and biological aging, we  
139 investigated the distribution of aging biomarkers, such as telomere length and PhenoAge<sup>19</sup>,  
140 across brain aging patterns identified above (Figure 3 and Appendix 1—table 6). Compared to  
141 pattern 1, participants in pattern 2 with more rapid GMV decrease had shorter leucocyte  
142 telomere length ( $P = 0.009$ , Cohen's  $D = -0.028$ ) and this association remained consistent after  
143 adjusting for sex, age, ethnic, BMI, smoking status and alcohol intake frequency<sup>20</sup>. Next, we  
144 examined PhenoAge, which was developed as an aging biomarker incorporating composite  
145 clinical and biochemical data<sup>19</sup>, and observed higher PhenoAge among participants with brain  
146 aging pattern 2 compared to pattern 1 ( $P = 0.019$ , Cohen's  $D = 0.027$ ). Again, the association  
147 remained significant after adjusting for sex, age, ethnic, BMI, smoking status, alcohol intake  
148 frequency and education years ( $P = 3.05 \times 10^{-15}$ , Cohen's  $D = 0.092$ ). Group differences in  
149 terms of each individual component of PhenoAge (including albumin, creatinine, glucose, c-  
150 reactive protein, lymphocytes percentage, mean corpuscular volume, erythrocyte distribution  
151 width, alkaline phosphatase and leukocyte count) were also investigated and results were  
152 consistent with PhenoAge (Appendix 1—figure 4).

153

154 **Accelerated brain aging was associated with cognitive decline and increased genetic**  
155 **susceptibilities to attention-deficit/hyperactivity disorder and delayed brain development.**

156 Next, we conducted comprehensive comparisons of cognitive functions between participants  
157 with different brain aging patterns. In general, those with brain aging pattern 2 (lower baseline  
158 total GMV and more rapid GMV decrease) exhibited worse cognitive performances compared  
159 to pattern 1. Specifically, brain aging pattern 2 showed lower numbers of correct pairs matching  
160 ( $P = 0.006$ , Cohen's  $D = -0.029$ ), worse prospective memory (OR = 0.943, 95% CI [0.891,  
161 0.999]), lower fluid intelligence ( $P < 1.00 \times 10^{-20}$ , Cohen's  $D = -0.102$ ), and worse numeric  
162 memory ( $P = 5.97 \times 10^{-11}$ , Cohen's  $D = -0.082$ ). No statistically significant differences were  
163 observed in terms of the reaction time ( $P = 0.99$ ) and prospective memory ( $P = 0.052$ ) between  
164 these two brain aging patterns after FDR correction. Results were consistent when using  
165 models adjusted for sex, age, and socioeconomic status (TDI, education and income)<sup>21,22</sup>

166 (Figure 4). Full results demonstrating the associations between brain aging patterns and  
167 cognitive functions are presented in Appendix 1—table 7.

168 Having observed cognitive decline among participants with accelerated brain aging pattern, we  
169 next investigated whether brain aging patterns were associated with genetic vulnerability to  
170 major neuropsychiatric disorders. Since current GWAS are under-powered for attention-  
171 deficit/hyperactivity disorder (ADHD) and autism spectrum disorders (ASD) and the difficulty  
172 in identifying genetic variants was likely due to their polygenic nature, we calculated the  
173 corresponding polygenic risk scores (PRS) using multiple p value thresholds. This approach  
174 enabled robust investigation of the association between genetic susceptibility of  
175 neuropsychiatric disorders and brain imaging phenotypes. PRS for major neuro-developmental  
176 disorders including attention-deficit/hyperactivity disorder (ADHD) and autism spectrum  
177 disorders (ASD), neurodegenerative diseases including Alzheimer’s disease (AD) and  
178 Parkinson’s disease (PD), neuropsychiatric disorders including bipolar disorder (BIP), major  
179 depressive disorder (MDD), and schizophrenia (SCZ), and delayed structural brain  
180 development (GWAS from an unpublished longitudinal neuroimaging study)<sup>23</sup> were calculated  
181 for each participant using multiple P value thresholds (from 0.005 to 0.5 at intervals of 0.005)  
182 and results were then averaged over all thresholds (Figure 5). The primary GWAS datasets used  
183 for calculating the PRS were listed in Appendix 1—table 8. Overall, we observed increased  
184 genetic susceptibility to ADHD ( $P = 0.040$ ) and delayed brain development ( $P = 1.48 \times 10^{-6}$ )  
185 among participants with brain aging pattern 2 after FDR correction, while no statistically  
186 significant differences were observed for ASD, AD, PD, BIP, MDD and SCZ (Figure 5). Details  
187 regarding the genetic liability to other common diseases and phenotypes using enhanced PRS  
188 from UK Biobank are displayed in Appendix 1—tables 9 and 10.

189

190 **Genome Wide Association Studies (GWAS) identified significant genetic loci associated**  
191 **with accelerated brain aging.**

192 Having observed significant associations between brain aging patterns and cognitive  
193 performances / genetic liabilities to major neurodevelopmental disorders, we further  
194 investigated if there exist genetic variants contributing to individualized brain aging phenotype.

195 We conducted genome-wide association studies (GWAS) using estimated total GMV at 60  
196 years old as the phenotype. This phenotype was derived by adding individual specific  
197 deviations to the population averaged total GMV, thus providing additional information  
198 compared to studies using only cross-sectional neuroimaging phenotypes.

199 Six independent single nucleotide polymorphisms (SNPs) were identified at genome-wide  
200 significance level ( $P < 5 \times 10^{-8}$ ) (Figure 6) and were subsequently mapped to genes using NCBI,  
201 Ensembl and UCSC Genome Browser database (Appendix 1—table 11). Among them, two  
202 SNPs (rs10835187 and rs779233904) were also found to be associated with multiple brain  
203 imaging phenotypes in previous studies<sup>24</sup>, such as regional and tissue volume, cortical area and  
204 white matter tract measurements. Compared to the GWAS using global gray matter volume as  
205 the phenotype, our GWAS revealed additional signal in chromosome 7 (rs7776725), which was  
206 mapped to the intron of FAM3C and encodes a secreted protein involved in pancreatic cancer<sup>25</sup>  
207 and Alzheimer's disease<sup>26</sup>. This signal was further validated to be associated with specific brain  
208 aging mode by another study using a data-driven decomposition approach<sup>27</sup>. In addition,  
209 another significant loci (rs10835187,  $P = 1.11 \times 10^{-13}$ ) is an intergenic variant between gene  
210 LGR4-AS1 and LIN7C, and was reported to be associated with bone density and brain volume  
211 measurement<sup>24,28</sup>. *LIN7C* encodes the Lin-7C protein, which is involved in the localization and  
212 stabilization of ion channels in polarized cells, such as neurons and epithelial cells<sup>29,30</sup>. Previous  
213 study has revealed the association of both allelic and haplotypic variations in the *LIN7C* gene  
214 with ADHD<sup>31</sup>.

215

### 216 **Mirroring patterns between brain aging and brain development.**

217 Having observed significant associations between brain aging and genetic susceptibility to  
218 neurodevelopmental disorders, we are now interested in examining the mirroring patterns  
219 between brain aging and brain development in the whole population, and whether these  
220 mirroring patterns were more pronounced in those with accelerated brain aging. Adolescents  
221 in the IMAGEN cohort showed more rapid GMV decrease in the frontal and parietal lobes,  
222 especially the frontal pole, superior frontal gyrus, rostral middle frontal gyrus, inferior parietal  
223 lobule and superior parietal lobule, while those in their mid-to-late adulthood showed more



224 accelerated GMV decrease in the temporal lobe, including medial orbitofrontal cortex, inferior  
225 parietal lobule and lateral occipital sulcus (Figure 7a). The mirroring patterns (with slower  
226 GMV decrease during brain development and more rapid GMV decrease during brain aging)  
227 were particularly prominent in inferior temporal gyrus, caudal anterior cingulate cortex,  
228 fusiform cortex, middle temporal gyrus and rostral anterior cingulate cortex (Figure 7b). The  
229 regional mirroring patterns became weaker when we focus on late brain aging at age 75 years  
230 old, especially in the frontal lobe and cingulate cortex. Further, mirroring patterns were  
231 represented more prominently in participants with brain aging pattern 2, where stronger  
232 mirroring between brain aging and brain development was observed in frontotemporal area,  
233 including lateral occipital sulcus and lingual gyrus (Figure 7c).

234

### 235 **Gene expression profiles were associated with delayed brain development and accelerated** 236 **brain aging.**

237 The Allen Human Brain Atlas (AHBA) transcriptomic dataset (<http://human.brain-map.org>)  
238 were used to obtain the spatial correlation between gene expression profiles across cortex and  
239 structural brain development/aging via partial least square (PLS) regression. The first PLS  
240 component explained 24.7% and 53.6% of the GMV change during brain development  
241 (estimated at age 15y,  $r_{\text{spearman}} = 0.51$ ,  $P_{\text{permutation}} = 0.03$ ) and brain aging (estimated at age 55y,  
242  $r_{\text{spearman}} = 0.49$ ,  $P_{\text{permutation}} = 1.5 \times 10^{-4}$ ), respectively. Seventeen of the 45 genes mapped to  
243 GWAS significant SNP were found in AHBA, with *LGR4* ( $r_{\text{spearman}} = 0.56$ ,  $P_{\text{permutation}} < 0.001$ )  
244 significantly associated with delayed brain development and *ESR1* ( $r_{\text{spearman}} = 0.53$ ,  $P_{\text{permutation}} <$   
245  $0.001$ ) and *FAM3C* ( $r_{\text{spearman}} = -0.37$ ,  $P_{\text{permutation}} = 0.004$ ) significantly associated with  
246 accelerated brain aging. *BDNF-AS* was positively associated with both delayed brain  
247 development and accelerated brain aging after spatial permutation test (Appendix 1—tables 12  
248 and 13).

249 Next, we screened the genes based on their contributions and effect directions to the first  
250 PLS components in brain development and brain aging. 990 and 2293 genes were identified to  
251 be positively associated with brain development and negatively associated with brain aging at  
252 FDR corrected P value of 0.005, respectively, representing gene expressions associated with

253 delayed brain development and accelerated brain aging. These genes were then tested for  
254 enrichment of GO biological processes and KEGG pathways. Genes associated with delayed  
255 brain development showed significant enrichment in “regulation of trans-synaptic signaling”,  
256 “forebrain development”, “signal release” and “cAMP signaling pathway” (Figure 8a), and  
257 genes associated with accelerated brain aging showed significant enrichment in  
258 “macroautophagy”, “establishment of protein localization to organelle”, “histone  
259 modification”, and “pathways of neurodegeneration – multiple diseases” (Figure 8b). Full  
260 results of the gene set enrichment analysis were provided in Appendix 1—figure 5. In summary,  
261 the analyses from using the databases of GO biological processes and KEGG Pathways indicate  
262 synaptic transmission as an important process in the common mechanisms of brain  
263 development and aging, and cellular processes (autophagy), as well as the progression of  
264 neurodegenerative diseases, are important processes in the mechanisms of brain aging.

265

## 266 **Discussion**

267 In this study, we adopted a data-driven approach and revealed two distinct brain aging patterns  
268 using large-scale longitudinal neuroimaging data in mid-to-late adulthood. Compared to brain  
269 aging pattern 1, brain aging pattern 2 were characterized by a faster rate of GMV decrease,  
270 accelerated biological aging, cognitive decline, and genetic susceptibility to  
271 neurodevelopmental disorders. By integrating longitudinal neuroimaging data from adult and  
272 adolescent cohorts, we demonstrated the “last in, first out” mirroring patterns between  
273 structural brain aging and brain development, and showed that the mirroring pattern was  
274 manifested in the temporal lobe and among participants with accelerated brain aging. Further,  
275 genome-wide association studies identified significant genetic loci contributing to accelerated  
276 brain aging, while spatial correlation between whole-brain transcriptomic profiles and  
277 structural brain aging / development revealed important gene sets associated with both  
278 accelerated brain aging and delayed brain development.

279 Brain aging is closely related to the onset and progression of neurodegenerative and  
280 neuropsychiatric disorders. Both neurodegenerative and neuropsychiatric disorders  
281 demonstrate strong inter-individual heterogeneity, which prevents the comprehensive

282 understanding of their neuropathology and neurogenetic basis. Therefore, multidimensional  
283 investigation into disease subtyping and population clustering of structural brain aging are  
284 crucial in elucidating the sources of heterogeneity and neurophysiological basis related to the  
285 disease spectrum<sup>32</sup>. In the last decades, major developments in the subtyping of Alzheimer's  
286 disease, dementia and Parkinson's disease, have provided new perspectives regarding their  
287 clinical diagnosis, treatment, disease progression and prognostics<sup>32-34</sup>. While previous studies  
288 of brain aging mostly focused on the cross-sectional differences between cases and healthy  
289 controls, we here delineated the structural brain aging patterns among healthy participants  
290 using a novel data-driven approach that captured both cross-sectional and longitudinal  
291 trajectories of the whole-brain gray matter volume<sup>35,36</sup>. The two brain aging patterns identified  
292 using the above approach showed large differences in the rate of change in medial  
293 occipitotemporal gyrus, which is involved in vision, word processing and scene recognition<sup>37-</sup>  
294 <sup>39</sup>. Significant reduction of the gray matter volume and abnormal changes of the functional  
295 connectivity in this region were found in subjects with mild cognitive impairment (MCI) and  
296 AD, respectively<sup>40,41</sup>. Previous research on brainAGE<sup>3,42</sup> (the difference between chronological  
297 age and the age predicted by the machine learning model of brain imaging data) showed that  
298 as a biomarker of accelerated brain aging, people with older brainAGE have accelerated  
299 biological aging and early signs of cognitive decline, which is consistent with our discoveries  
300 in this study. Our results support the establishment of a network connecting brain aging patterns  
301 with biological aging profiles involving multi-organ systems throughout the body<sup>43</sup>. Since  
302 structural brain patterns might manifest and diverge decades before cognitive decline<sup>44</sup>,  
303 subtyping of brain aging patterns could aid in the early prediction of cognitive decline and  
304 severe neurodegenerative and neuropsychiatric disorders.

305 Mirroring pattern between brain development and brain aging has long been hypothesized  
306 by postulating that phylogenetically newer and ontogenetically less precocious brain structures  
307 degenerate relatively early<sup>13</sup>. Early studies have reported a positive correlation between age-  
308 related differences of cortical volumes and precedence of myelination of intracortical fibers<sup>45</sup>.  
309 Large differences in the patterns of change between adolescent late development and aging in  
310 the medial temporal cortex were previously found in studies of brain development and aging

311 patterns<sup>12</sup>. Here, we compared the annual volume change of the whole-brain gray matter during  
312 brain development and early / late stages of brain aging, and found that mirroring patterns are  
313 predominantly localized to the lateral / medial temporal cortex and the cingulate cortex. These  
314 cortical regions characterized by “last-in, first-out” mirroring patterns showed increased  
315 vulnerability to the several neuropsychiatric disorders. For example, regional deficits in the  
316 superior temporal gyrus and medial temporal lobe were observed in schizophrenia<sup>46</sup>, along with  
317 morphological abnormalities in the medial occipitotemporal gyrus<sup>47</sup>. Children diagnosed with  
318 ADHD had lower brain surface area in the frontal, cingulate, and temporal regions<sup>48</sup>. Douaud  
319 et al.<sup>13</sup> revealed a population transmodal network with lifespan trajectories characterized by the  
320 mirroring pattern of development and aging. We investigated the genetic susceptibility to  
321 individual-level mirroring patterns based on the lasting impact of neurodevelopmental genetic  
322 factors on brain<sup>15</sup>, demonstrating that those with more rapidly brain aging patterns have a  
323 higher risk of delayed development.

324 Identifying genes contributing to structural brain aging remains a critical step in  
325 understanding the molecular changes and biological mechanisms that govern age-related  
326 cognitive decline. Several genetic loci have been reported to be associated with brain aging  
327 modes and neurocognitive decline, many of which demonstrated global overlap with  
328 neuropsychiatric disorders and their related risk factors<sup>27,49,50</sup>. Here, we focused on the  
329 individual brain aging phenotype by estimating individual deviation from the population  
330 averaged total GMV and conducted genome-wide association analysis with this phenotype.  
331 Our approach identified 6 risk SNPs associated with accelerated brain aging, most of which  
332 could be further validated by previous studies using population averaged brain aging  
333 phenotypes. However, our approach revealed additional genetic signals and demonstrated  
334 genetic architecture underlying brain aging patterns overlap with bone density<sup>28,51</sup>. In addition,  
335 molecular profiling of the aging brain has been thoroughly investigated among patients with  
336 neurodegenerative diseases, but rarely conducted to shed light on the mirroring patterns among  
337 healthy participants. Analysis of the spatial correlation between gene expression profiles and  
338 structural brain development / aging further identified genes contributing to delayed brain  
339 development and accelerated brain aging. Specifically, expression of gene *BDNF-AS* was

340 significantly associated with both processes. *BDNF-AS* is an antisense RNA gene and plays a  
341 role in the pathoetiology of non-neoplastic conditions mainly through the mediation of *BDNF*<sup>52</sup>.  
342 *LGR4* (associated with delayed brain development) and *FAM3C* (associated with accelerated  
343 brain aging) identified in the spatial genetic association analysis also validated our findings in  
344 the GWAS.

345 There are several limitations in the current study that need to be addressed in future research.  
346 Firstly, the UK Biobank cohort, which we leveraged to identify population clustering of brain  
347 aging patterns, had a limited number of repeated structural MRI scans. Therefore, it remains  
348 challenging to obtain robust estimation of the longitudinal whole-brain GMV trajectory at the  
349 individual level. As a robustness check, we have calculated both intra-class correlation and  
350 variance of both random intercept and age slope to ensure appropriateness of the mixed effect  
351 models. Secondly, although aging is driven by numerous hallmarks, we have only investigated  
352 the association between brain aging patterns and biological aging in terms of telomere length  
353 and blood biochemical markers due to limitations of data access. Other dimensions of aging  
354 hallmarks and their relationship with structural brain aging need to be investigated in the future.  
355 Thirdly, our genomic analyses were restricted to "white British" participants of European  
356 ancestry. The diversity of genomic analyses will continue to improve as the sample sizes of  
357 GWAS of non-European ancestry increase. Further, although the gene expression maps from  
358 Allen Human Brain Atlas enabled us to gain insights into the spatial coupling between gene  
359 expression profiles and mirroring patterns of the brain, the strong inter-individual variation of  
360 whole-brain gene expression levels and large temporal span of the human brain samples may  
361 lead to the inaccurate correspondence in the observed associations. Finally, we focused on  
362 structural MRIs in deriving brain aging patterns in this analysis, future investigations could  
363 consider other brain imaging modalities from a multi-dimensional perspective. Nevertheless,  
364 our study represents a novel attempt for population clustering of structural brain aging and  
365 validated the mirroring pattern hypothesis by leveraging large-scale adolescent and adult  
366 cohorts.

## 367 **Methods**

368 **Participants** T1-weighted brain MRI images were obtained from 37,013 individuals aged 44-  
369 82 years old from UK Biobank (36,914 participants at baseline visit in 2014+, 4,007  
370 participants at the first follow-up visit in 2019+). All participants from UK Biobank provided  
371 written informed consent, and ethical approval was granted by the North West Multi-Center  
372 Ethics committee (<https://www.ukbiobank.ac.uk/learn-more-about-uk-biobank/about-us/ethics>)  
373 with research ethics committee (REC) approval number 16/NW/0274. Participants were  
374 excluded if they were diagnosed with severe psychiatric disorders or neurological diseases  
375 using ICD-10 primary and secondary diagnostic codes or from self-reported medical conditions  
376 at UK Biobank assessment center (see Appendix 1—tables 1 and 2). Data were obtained under  
377 application number 19542. 1,529 adolescents with structural MRI images were drawn from the  
378 longitudinal project IMAGEN (1,463 at age 14, 1,377 at age 19 and 1,148 at age 23), of which  
379 the average number of MRI scans was 2.61 per adolescent. The IMAGEN study was approved  
380 by local ethics research committees of King's College London, University of Nottingham,  
381 Trinity College Dublin, University of Heidelberg, Technische Universität Dresden,  
382 Commissariat à l'Énergie Atomique et aux Énergies Alternatives, and University Medical  
383 Center at the University of Hamburg in compliance with the Declaration of Helsinki<sup>53</sup>.  
384 Informed consent was given by all participants and a parent/guardian of each participant.

385  
386 **MRI acquisition** Quality-controlled T1-weighted neuroimaging data from UK Biobank and  
387 IMAGEN were processed using FreeSurfer v6.0. Detailed imaging processing pipeline can be  
388 found online for UK Biobank ([https://biobank.uctsu.ox.ac.uk/crystal/crystal/docs/brain\\_mri.pdf](https://biobank.uctsu.ox.ac.uk/crystal/crystal/docs/brain_mri.pdf))  
389 and IMAGEN ([https://github.com/imagen2/imagen\\_mri](https://github.com/imagen2/imagen_mri)). Briefly, cortical gray matter volume  
390 (GMV) from 33 regions in each hemisphere were generated using Desikan–Killiany Atlas<sup>54</sup>,  
391 and total gray matter volume (TGMV), intracranial volume (ICV) and subcortical volume were  
392 derived from ASEG atlas<sup>55</sup> (See Appendix 1—table 3). Regional volume was averaged across  
393 left and right hemispheres. To avoid deficient segmentation or parcellation, participants with  
394 TGMV, ICV or regional GMV beyond 4 standard deviations from the sample mean were  
395 considered as outliers and removed from the following analyses.

396

397 **Identification of longitudinal brain aging patterns** Whole-brain GMV trajectory was  
398 estimated for each participant in 40 brain regions of interest (ROIs) (33 cortical regions and 7  
399 subcortical regions), using mixed effect regression model with fixed linear and quadratic age  
400 effects, random intercept and random age slope. Covariates include sex, assessment center,  
401 handedness, ethnic, and ICV. Models with random intercept and with both random intercept  
402 and random age slope were compared using AIC, BIC and evaluation of intra-class correlation  
403 (ICC). Results suggested that random age slope model should be chosen for almost all ROIs  
404 (Appendix 1—table 14). Deviation of regional GMV from the population average was  
405 calculated for each participant at age 60 years and dimensionality reduction was conducted via  
406 principal component analysis (PCA). The first 15 principal components explaining  
407 approximately 70% of the total variations of regional GMV deviation were used in multivariate  
408 k-means clustering. Optimal number of clusters was chosen using both elbow diagram and  
409 contour coefficient (Appendix 1—figure 6). Rates of volumetric change for total gray matter  
410 and each ROI were estimated using generalized additive mixed effect models (GAMM) with  
411 fixed cubic splines of age, random intercept and random age slope, which incorporates both  
412 cross-sectional between-subject variation and longitudinal within-subject variation from  
413 40,921 observations and 37,013 participants. Covariates include sex, assessment center,  
414 handedness, ethnic, and ICV. We also applied PCA and locally linear embedding (LLE)<sup>56</sup> to  
415 the adjusted GMV ROIs in order to map the high-dimensional imaging-derived phenotypes to  
416 a low-dimensional space for stratification visualisation. The GMV of 40 ROIs at baseline were  
417 linearly adjusted for sex, assessment center, handedness, ethnic, ICV, and second-degree  
418 polynomial in age to be consistent with the whole-brain GMV trajectory model.

419

420 **Association between brain aging patterns and biological aging, cognitive decline and**  
421 **genetic susceptibilities of neuropsychiatric disorders** Individuals with Z-standardized  
422 leucocyte telomere length<sup>57</sup> and blood biochemistry (which were used to calculate PhenoAge<sup>19</sup>  
423 that characterizes biological aging) outside 4 standard deviations from the sample mean were  
424 excluded for better quality control. A total of 11 cognitive tests performed on the touchscreen

425 questionnaire were included in the analysis. More information about the cognitive tests is  
426 provided in Supplementary Information. Comparisons of biological aging (leucocyte telomere  
427 length, PhenoAge) and cognitive function were conducted among participants with different  
428 brain aging patterns using both unadjusted and adjusted multivariate regression models with  
429 Bonferroni / FDR correction. Polygenic Risk Scores (PRS) were calculated for autism spectrum  
430 disorder (ASD), attention deficit hyperactivity disorder (ADHD), Alzheimer's disease (AD),  
431 Parkinson's Disease (PD), bipolar disorder (BIP), major depressive disorder (MDD),  
432 schizophrenia (SCZ) and delayed brain development using GWAS summary statistics<sup>23</sup> at  
433 multiple P value thresholds (from 0.005 to 0.5 at intervals of 0.005, and 1), with higher P value  
434 thresholds incorporating larger number of independent SNPs. After quality control of genotype  
435 and imaging data, PRSs were generated for 25,861 participants on UK Biobank genotyping  
436 data. SNPs were pruned and clumped with a cutoff  $r^2 \geq 0.1$  within a 250 kb window. All  
437 calculations were conducted using PRSice v2.3.5<sup>58</sup>. Enhanced PRS from UK Biobank  
438 Genomics for multiple diseases were also tested. Detailed instructions for calculating enhanced  
439 PRS in UK Biobank can be found in research of Thompson et al.<sup>59</sup> Comparisons of  
440 neuropsychiatric disorders were conducted among participants with different brain aging  
441 patterns using t test with FDR correction. All statistical tests were two-sided.

442

#### 443 **Genome Wide Association Study to identify SNPs associated with brain aging patterns**

444 We performed Genome-wide association studies (GWAS) on individual deviations of total  
445 GMV relative to the population average at 60 years using PLINK 2.0<sup>60</sup>. Variants with missing  
446 call rates exceeding 5%, minor allele frequency below 0.5% and imputation INFO score less  
447 than 0.8 were filtered out after the genotyping quality control for UK Biobank Imputation V3  
448 dataset. Among the 337,138 unrelated "white British" participants of European ancestry  
449 included in our study, 25,861 with recent UK ancestry and accepted genotyping and imaging  
450 quality control were included in the GWAS. The analyses were further adjusted for age, age<sup>2</sup>,  
451 sex, assessment center, handedness, ethnic, ICV, and the first 10 genetic principal components.  
452 Genome-wide significant SNPs ( $P < 5 \times 10^{-8}$ ) obtained from the GWAS were clumped by  
453 linkage disequilibrium (LD) ( $r^2 < 0.1$  within a 250 kb window) using UKB release2b White



454 British as the reference panel. We subsequently performed gene-based annotation in FUMA<sup>61</sup>  
455 using genome-wide significant SNPs and SNPs in close LD ( $r^2 \geq 0.1$ ) using Annotate Variation  
456 (ANNOVAR) on Ensemble v102 genes<sup>62</sup>.

457

458 **Mirroring patterns between brain aging and brain development** To validate the “last in,  
459 first out” mirroring hypothesis, we evaluated the structural association between brain  
460 development and brain aging. Longitudinal neuroimaging data from 1,529 adolescents in the  
461 IMGAEN cohort and 3,908 mid-to-late adulthood in the UK Biobank cohort were analyzed.  
462 Annual percentage volume change (APC) for each ROI was calculated among individuals with  
463 at least 2 structural MRI scans by subtracting the baseline GMV from follow-up GMV and  
464 dividing by the number of years between baseline and follow-up visits. Region-specific APC  
465 was regressed on age using smoothing spline with cross validated degree of freedom. Estimated  
466 APC for each ROI was obtained at age 15y for adolescents and at age 55y (early aging) and  
467 75y (late aging) for participants in UK Biobank. Region-specific APC during adolescence (or  
468 mid-to-late adulthood) was then standardized across all cortical regions to create the brain  
469 development (or aging) map. Finally, the brain development map and brain aging map were  
470 compared to assess the mirroring pattern for each ROI in the overall population and across  
471 different aging subgroups.

472

473 **Gene Expression Analysis** The Allen Human Brain Atlas (AHBA) dataset  
474 (<http://human.brain-map.org>), which comprises gene expression measurements in six  
475 postmortem adults (age 24–57y) across 83 parcellated brain regions<sup>63,64</sup>, were used to identify  
476 gene expressions significantly associated with structural brain development and aging. The  
477 expression profiles of 15,633 genes were averaged across donors to form a  $83 \times 15,633$   
478 transcriptional matrix and partial least squares (PLS) regression was adopted for analyzing the  
479 association between regional change rate of gray matter volume and gene expression profiles.  
480 Specifically, estimated regional APC at 15 (obtained from IMAGEN cohort) and 55 years old  
481 (obtained from UK Biobank) were regressed on the high-dimensional gene expression profiles  
482 upon regularization. Associations between the first PLS component and estimated APC during

483 brain development and brain aging were tested by spatial permutation analysis (10,000 times)<sup>65</sup>.  
484 Additionally, gene expression profiles of genes mapped to GWAS significant SNP were  
485 extracted from AHBA. The association between gene expression profiles of mapped genes and  
486 estimated APC during brain development and aging was also tested by spatial permutation  
487 analysis. Statistical significance of each gene's contribution to the first PLS component was  
488 tested with standard error calculated using bootstrap<sup>66-68</sup>, and genes significantly associated  
489 with delayed brain development and accelerated brain aging were selected. Enrichment of  
490 Kyoto Encyclopedia of Genes and Genomes (KEGG) pathways and gene ontology (GO) of  
491 biological processes for these selected genes were analyzed using R package clusterProfiler<sup>69</sup>.  
492 All statistical significances were corrected for multiple testing using FDR.

493

## 494 **Data availability**

495 The summary statistics of GWAS for individual deviations of total GMV is available at [link](#). All the UK  
496 Biobank data used in the study are available at <https://www.ukbiobank.ac.uk>. The IMAGEN project data  
497 are available at <https://imagen-project.org>. GWAS summary statistics used to calculate the PRS are  
498 available in the Appendix 1—table 8. Human gene expression data are available in the Allen Human Brain  
499 Atlas dataset: <https://human.brainmap.org>.

500

## 501 **Code availability**

502 R version 4.2.0 was used to perform statistical analyses. FreeSurfer version 6.0 was used to process  
503 neuroimaging data. lme4 1.1 in R version 4.2.0 was used to perform longitudinal data analyses. PRSice  
504 version 2.3.5 (<https://choishingwan.github.io/PRSice/>) was used to calculate the PRS. PLINK 2.0  
505 ([www.cog-genomics.org/plink/2.0/](http://www.cog-genomics.org/plink/2.0/)) and FUMA version 1.5.6 (<https://fuma.ctglab.nl/>) were used to  
506 perform genome-wide association analysis, and ANNOVAR was used to perform gene-based annotation.  
507 AHBA microarray expression data were processed using abagen toolbox version 0.1.3  
508 (<https://doi.org/10.5281/zenodo.5129257>). The rotate\_parcellation code used to perform a spatial  
509 permutation test of a parcellated cortical map: [https://github.com/frantisekvasa/rotate\\_parcellation](https://github.com/frantisekvasa/rotate_parcellation). Code  
510 for PLS analysis and bootstrapping to estimate PLS weights are available at  
511 [https://github.com/KirstieJane/NSPN\\_WhitakerVertes\\_PNAS2016/tree/master/SCRIPTS](https://github.com/KirstieJane/NSPN_WhitakerVertes_PNAS2016/tree/master/SCRIPTS). clusterProfiler  
512 4.6 in R version 4.2.0 was used to analyze gene-set enrichment.

## 513 References

- 514 1. Fjell, A. M. & Walhovd, K. B. Structural brain changes in aging: courses, causes and cognitive  
515 consequences. *Reviews in the Neurosciences* **21**, 187–222 (2010).
- 516 2. Shaw, P. *et al.* Neurodevelopmental trajectories of the human cerebral cortex. *Journal of neuroscience*  
517 **28**, 3586–3594 (2008).
- 518 3. Elliott, M. L. *et al.* Brain-age in midlife is associated with accelerated biological aging and cognitive  
519 decline in a longitudinal birth cohort. *Molecular psychiatry* **26**, 3829–3838 (2021).
- 520 4. Mattson, M. P. & Arumugam, T. V. Hallmarks of brain aging: adaptive and pathological modification  
521 by metabolic states. *Cell metabolism* **27**, 1176–1199 (2018).
- 522 5. Park, D. C. & Reuter-Lorenz, P. The adaptive brain: aging and neurocognitive scaffolding. *Annual*  
523 *review of psychology* **60**, 173–196 (2009).
- 524 6. Mariani, E., Polidori, M., Cherubini, A. & Mecocci, P. Oxidative stress in brain aging,  
525 neurodegenerative and vascular diseases: an overview. *Journal of Chromatography B* **827**, 65–75 (2005).
- 526 7. Kaufmann, T. *et al.* Common brain disorders are associated with heritable patterns of apparent aging  
527 of the brain. *Nature neuroscience* **22**, 1617–1623 (2019).
- 528 8. Raz, N., Ghisletta, P., Rodrigue, K. M., Kennedy, K. M. & Lindenberger, U. Trajectories of brain  
529 aging in middle-aged and older adults: regional and individual differences. *Neuroimage* **51**, 501–511  
530 (2010).
- 531 9. Raz, N. & Rodrigue, K. M. Differential aging of the brain: patterns, cognitive correlates and  
532 modifiers. *Neuroscience & Biobehavioral Reviews* **30**, 730–748 (2006).
- 533 10. Courchesne, E. *et al.* Normal brain development and aging: quantitative analysis at in vivo MR  
534 imaging in healthy volunteers. *Radiology* **216**, 672–682 (2000).
- 535 11. McGinnis, S. M., Brickhouse, M., Pascual, B. & Dickerson, B. C. Age-related changes in the  
536 thickness of cortical zones in humans. *Brain topography* **24**, 279–291 (2011).
- 537 12. Tamnes, C. K. *et al.* Brain development and aging: overlapping and unique patterns of change.  
538 *Neuroimage* **68**, 63–74 (2013).
- 539 13. Douaud, G. *et al.* A common brain network links development, aging, and vulnerability to disease.  
540 *Proc. Natl. Acad. Sci. U.S.A.* **111**, 17648–17653 (2014).
- 541 14. Suzuki, H. *et al.* Associations of regional brain structural differences with aging, modifiable risk  
542 factors for dementia, and cognitive performance. *JAMA network open* **2**, e1917257–e1917257 (2019).
- 543 15. Fjell, A. M. *et al.* Development and aging of cortical thickness correspond to genetic organization  
544 patterns. *Proceedings of the National Academy of Sciences* **112**, 15462–15467 (2015).
- 545 16. Nyberg, L. *et al.* Individual differences in brain aging: heterogeneity in cortico-hippocampal but not  
546 caudate atrophy rates. *Cerebral Cortex* **33**, 5075–5081 (2023).
- 547 17. Alexander-Bloch, A., Giedd, J. N. & Bullmore, E. Imaging structural co-variance between human  
548 brain regions. *Nature Reviews Neuroscience* **14**, 322–336 (2013).
- 549 18. Whitwell, J. L. *et al.* Distinct anatomical subtypes of the behavioural variant of frontotemporal  
550 dementia: a cluster analysis study. *Brain* **132**, 2932–2946 (2009).
- 551 19. Levine, M. E. *et al.* An epigenetic biomarker of aging for lifespan and healthspan. *Aging (alban NY)*  
552 **10**, 573 (2018).
- 553 20. Demanelis, K. *et al.* Determinants of telomere length across human tissues. *Science* **369**, eaaz6876  
554 (2020).

- 555 21. Foster, H. M. *et al.* The effect of socioeconomic deprivation on the association between an extended  
556 measurement of unhealthy lifestyle factors and health outcomes: a prospective analysis of the UK Biobank  
557 cohort. *The Lancet Public Health* **3**, e576–e585 (2018).
- 558 22. Townsend, P., Phillimore, P. & Beattie, A. *Health and Deprivation: Inequality and the North*. vol. 8  
559 (Taylor & Francis, 2023).
- 560 23. Shi, R. *et al.* Structural neurodevelopment at the individual level - a life-course investigation using  
561 ABCD, IMAGEN and UK Biobank data. *medRxiv* 2023–09 (2023).
- 562 24. Smith, S. M. *et al.* An expanded set of genome-wide association studies of brain imaging phenotypes  
563 in UK Biobank. *Nature neuroscience* **24**, 737–745 (2021).
- 564 25. Grønberg, M. *et al.* Biomarker Discovery from Pancreatic Cancer Secretome Using a Differential  
565 Proteomic Approach\* S. *Molecular & Cellular Proteomics* **5**, 157–171 (2006).
- 566 26. Liu, L., Watanabe, N., Akatsu, H. & Nishimura, M. Neuronal expression of ILEI/FAM3C and its  
567 reduction in Alzheimer’s disease. *Neuroscience* **330**, 236–246 (2016).
- 568 27. Smith, S. M. *et al.* Brain aging comprises many modes of structural and functional change with  
569 distinct genetic and biophysical associations. *elife* **9**, e52677 (2020).
- 570 28. Estrada, K. *et al.* Genome-wide meta-analysis identifies 56 bone mineral density loci and reveals 14  
571 loci associated with risk of fracture. *Nature genetics* **44**, 491–501 (2012).
- 572 29. Bohl, J., Brimer, N., Lyons, C. & Pol, S. B. V. The stardust family protein MPP7 forms a tripartite  
573 complex with LIN7 and DLG1 that regulates the stability and localization of DLG1 to cell junctions.  
574 *Journal of Biological Chemistry* **282**, 9392–9400 (2007).
- 575 30. Kaeck, S. M., Whitfield, C. W. & Kim, S. K. The LIN-2/LIN-7/LIN-10 complex mediates basolateral  
576 membrane localization of the *C. elegans* EGF receptor LET-23 in vulval epithelial cells. *Cell* **94**, 761–771  
577 (1998).
- 578 31. Lanktree, M. *et al.* Association study of brain-derived neurotrophic factor (BDNF) and LIN-7  
579 homolog (LIN-7) genes with adult attention-deficit/hyperactivity disorder. *American Journal of Medical  
580 Genetics Part B: Neuropsychiatric Genetics* **147**, 945–951 (2008).
- 581 32. Habes, M. *et al.* Disentangling heterogeneity in Alzheimer’s disease and related dementias using data-  
582 driven methods. *Biological psychiatry* **88**, 70–82 (2020).
- 583 33. Berg, D. *et al.* Prodromal Parkinson disease subtypes—key to understanding heterogeneity. *Nature  
584 Reviews Neurology* **17**, 349–361 (2021).
- 585 34. Ferreira, D., Nordberg, A. & Westman, E. Biological subtypes of Alzheimer disease: A systematic  
586 review and meta-analysis. *Neurology* **94**, 436–448 (2020).
- 587 35. Feczko, E. *et al.* The heterogeneity problem: approaches to identify psychiatric subtypes. *Trends in  
588 cognitive sciences* **23**, 584–601 (2019).
- 589 36. Poulakis, K. *et al.* Multi-cohort and longitudinal Bayesian clustering study of stage and subtype in  
590 Alzheimer’s disease. *Nature communications* **13**, 4566 (2022).
- 591 37. Bogousslavsky, J., Miklossy, J., Deruaz, J.-P., Assal, G. & Regli, F. Lingual and fusiform gyri in  
592 visual processing: a clinico-pathologic study of superior altitudinal hemianopia. *Journal of Neurology,  
593 Neurosurgery & Psychiatry* **50**, 607–614 (1987).
- 594 38. Epstein, R., Harris, A., Stanley, D. & Kanwisher, N. The parahippocampal place area: recognition,  
595 navigation, or encoding? *Neuron* **23**, 115–125 (1999).
- 596 39. Mechelli, A., Humphreys, G. W., Mayall, K., Olson, A. & Price, C. J. Differential effects of word  
597 length and visual contrast in the fusiform and lingual gyri during. *Proceedings of the Royal Society of  
598 London. Series B: Biological Sciences* **267**, 1909–1913 (2000).

- 599 40. Chételat, G. *et al.* Using voxel-based morphometry to map the structural changes associated with  
600 rapid conversion in MCI: a longitudinal MRI study. *Neuroimage* **27**, 934–946 (2005).
- 601 41. Yao, Z. *et al.* Abnormal cortical networks in mild cognitive impairment and Alzheimer’s disease.  
602 *PLoS computational biology* **6**, e1001006 (2010).
- 603 42. Christman, S. *et al.* Accelerated brain aging predicts impaired cognitive performance and greater  
604 disability in geriatric but not midlife adult depression. *Translational Psychiatry* **10**, 317 (2020).
- 605 43. Tian, Y. E. *et al.* Heterogeneous aging across multiple organ systems and prediction of chronic disease  
606 and mortality. *Nature Medicine* **29**, 1221–1231 (2023).
- 607 44. Aljondi, R., Szoeki, C., Steward, C., Yates, P. & Desmond, P. A decade of changes in brain volume  
608 and cognition. *Brain imaging and behavior* **13**, 554–563 (2019).
- 609 45. Raz, N. Aging of the brain and its impact on cognitive performance: Integration of structural and  
610 functional findings. (2000).
- 611 46. Honea, R., Crow, T. J., Passingham, D. & Mackay, C. E. Regional deficits in brain volume in  
612 schizophrenia: a meta-analysis of voxel-based morphometry studies. *American Journal of Psychiatry* **162**,  
613 2233–2245 (2005).
- 614 47. Schultz, C. C. *et al.* Increased parahippocampal and lingual gyrification in first-episode  
615 schizophrenia. *Schizophrenia Research* **123**, 137–144 (2010).
- 616 48. Hoogman, M. *et al.* Brain imaging of the cortex in ADHD: a coordinated analysis of large-scale  
617 clinical and population-based samples. *American Journal of Psychiatry* **176**, 531–542 (2019).
- 618 49. Glahn, D. C. *et al.* Genetic basis of neurocognitive decline and reduced white-matter integrity in  
619 normal human brain aging. *Proceedings of the National Academy of Sciences* **110**, 19006–19011 (2013).
- 620 50. Brouwer, R. M. *et al.* Genetic variants associated with longitudinal changes in brain structure across  
621 the lifespan. *Nature neuroscience* **25**, 421–432 (2022).
- 622 51. Zheng, H.-F. *et al.* Whole-genome sequencing identifies EN1 as a determinant of bone density and  
623 fracture. *Nature* **526**, 112–117 (2015).
- 624 52. Ghafouri-Fard, S., Khoshbakht, T., Taheri, M. & Ghanbari, M. A concise review on the role of BDNF-  
625 AS in human disorders. *Biomedicine & Pharmacotherapy* **142**, 112051 (2021).
- 626 53. Association, W. M. & others. World Medical Association Declaration of Helsinki: ethical principles  
627 for medical research involving human subjects. *Jama* **310**, 2191–2194 (2013).
- 628 54. Desikan, R. S. *et al.* An automated labeling system for subdividing the human cerebral cortex on MRI  
629 scans into gyral based regions of interest. *Neuroimage* **31**, 968–980 (2006).
- 630 55. Fischl, B. *et al.* Whole brain segmentation: automated labeling of neuroanatomical structures in the  
631 human brain. *Neuron* **33**, 341–355 (2002).
- 632 56. Roweis, S. T. & Saul, L. K. Nonlinear dimensionality reduction by locally linear embedding. *science*  
633 **290**, 2323–2326 (2000).
- 634 57. Codd, V. *et al.* Polygenic basis and biomedical consequences of telomere length variation. *Nature*  
635 *genetics* **53**, 1425–1433 (2021).
- 636 58. Choi, S. W. & O’Reilly, P. F. PRSice-2: Polygenic Risk Score software for biobank-scale data.  
637 *Gigascience* **8**, giz082 (2019).
- 638 59. Thompson, D. J. *et al.* UK Biobank release and systematic evaluation of optimised polygenic risk  
639 scores for 53 diseases and quantitative traits. *MedRxiv* 2022–06 (2022).
- 640 60. Chang, C. C. *et al.* Second-generation PLINK: rising to the challenge of larger and richer datasets.  
641 *Gigascience* **4**, s13742-015 (2015).

- 642 61. Watanabe, K., Taskesen, E., Van Bochoven, A. & Posthuma, D. Functional mapping and annotation of  
643 genetic associations with FUMA. *Nature communications* **8**, 1826 (2017).
- 644 62. Wang, K., Li, M. & Hakonarson, H. ANNOVAR: functional annotation of genetic variants from high-  
645 throughput sequencing data. *Nucleic acids research* **38**, e164–e164 (2010).
- 646 63. Hawrylycz, M. J. *et al.* An anatomically comprehensive atlas of the adult human brain transcriptome.  
647 *Nature* **489**, 391–399 (2012).
- 648 64. Markello, R. D. *et al.* Standardizing workflows in imaging transcriptomics with the abagen toolbox.  
649 *elife* **10**, e72129 (2021).
- 650 65. Váša, F. *et al.* Adolescent Tuning of Association Cortex in Human Structural Brain Networks.  
651 *Cerebral Cortex* **28**, 281–294 (2018).
- 652 66. Li, J. *et al.* Cortical structural differences in major depressive disorder correlate with cell type-specific  
653 transcriptional signatures. *Nature communications* **12**, 1647 (2021).
- 654 67. Morgan, S. E. *et al.* Cortical patterning of abnormal morphometric similarity in psychosis is  
655 associated with brain expression of schizophrenia-related genes. *Proceedings of the National Academy of*  
656 *Sciences* **116**, 9604–9609 (2019).
- 657 68. Romero-Garcia, R. *et al.* Schizotypy-related magnetization of cortex in healthy adolescence is  
658 colocated with expression of schizophrenia-related genes. *Biological psychiatry* **88**, 248–259 (2020).
- 659 69. Yu, G., Wang, L.-G., Han, Y. & He, Q.-Y. clusterProfiler: an R package for comparing biological  
660 themes among gene clusters. *Omics: a journal of integrative biology* **16**, 284–287 (2012).
- 661

## 662 Acknowledgements

663 This research used the UK Biobank Resource under application number 19542. We thank all  
664 participants and researchers from the UK Biobank. We thank the IMAGEN Consortium for  
665 providing the discover data. This work received support from the following sources: the  
666 National Nature Science Foundation of China (No.82304241 [to X.L.]), National Key R&D  
667 Program of China (No.2019YFA0709502 [to J.F.], No.2018YFC1312904 [to J.F.]), Shanghai  
668 Municipal Science and Technology Major Project (No.2018SHZDZX01 [to J.F.], ZJ Lab [to  
669 J.F.], and Shanghai Center for Brain Science and Brain-Inspired Technology [to J.F.]), the  
670 111 Project (No.B18015 [to J.F.]), the European Union-funded FP6 Integrated Project  
671 IMAGEN (Reinforcement-related behaviour in normal brain function and psychopathology)  
672 (LSHM-CT- 2007-037286 [to G.S.]), the Horizon 2020 funded ERC Advanced Grant  
673 ‘STRATIFY’ (Brain network based stratification of reinforcement-related disorders) (695313  
674 [to G.S.]), Human Brain Project (HBP SGA 2, 785907, and HBP SGA 3, 945539 [to G.S.]),  
675 the Medical Research Council Grant ‘c-VEDA’ (Consortium on Vulnerability to  
676 Externalizing Disorders and Addictions) (MR/N000390/1 [to G.S.]), the National Institute of  
677 Health (NIH) (R01DA049238 [to G.S.], A decentralized macro and micro gene-by-  
678 environment interaction analysis of substance use behavior and its brain biomarkers), the  
679 National Institute for Health Research (NIHR) Biomedical Research Centre at South London  
680 and Maudsley NHS Foundation Trust and King’s College London, the Bundesministerium für  
681 Bildung und Forschung (BMBF grants 01GS08152; 01EV0711 [to G.S.]; Forschungsnetz  
682 AERIAL 01EE1406A, 01EE1406B; Forschungsnetz IMAC-Mind 01GL1745B [to G.S.]), the  
683 Deutsche Forschungsgemeinschaft (DFG grants SM 80/7-2, SFB 940, TRR 265, NE  
684 1383/14-1 [to G.S.]), the Medical Research Foundation and Medical Research Council  
685 (grants MR/R00465X/1 and MR/S020306/1 [to S.D.]), the National Institutes of Health  
686 (NIH) funded ENIGMA (grants 5U54EB020403-05 and 1R56AG058854-01 [to S.D.]),  
687 NSFC grant 82150710554 [to G.S.] and European Union funded project ‘environMENTAL’,  
688 grant no: 101057429 [to G.S.]. Further support was provided by grants from: - the ANR  
689 (ANR-12-SAMA-0004, AAPG2019 - GeBra [to J.-L.M.]), the Eranet Neuron (AF12-  
690 NEUR0008-01 - WM2NA; and ANR-18-NEUR00002-01 - ADORe [to J.-L.M.]), the  
691 Fondation de France (00081242 [to J.-L.M.]), the Fondation pour la Recherche Médicale  
692 (DPA20140629802 [to J.-L.M.]), the Mission Interministérielle de Lutte-contre-les-Drogues-  
693 et-les-Conduites-Addictives (MILDECA [to J.-L.M.]), the Assistance-Publique-Hôpitaux-de-  
694 Paris and INSERM (interface grant [to M.-L.P.M.]), Paris Sud University IDEX 2012 [to J.-  
695 L.M.], the Fondation de l’Avenir (grant AP-RM-17-013 [to M.-L.P.M.]), the Fédération pour  
696 la Recherche sur le Cerveau [to G.S.]; the National Institutes of Health, Science Foundation  
697 Ireland (16/ERC/3797 [to R.W.]) and by NIH Consortium grant U54 EB020403 [to S.D.],  
698 supported by a cross-NIH alliance that funds Big Data to Knowledge Centres of Excellence.  
699 The funders had no role in study design, data collection and analysis, decision to publish or  
700 preparation of the manuscript.

701

## 702 Competing interests

703 Dr Banaschewski served in an advisory or consultancy role for eye level, Infectopharm,  
704 Lundbeck, Medice, Neurim Pharmaceuticals, Oberberg GmbH, Roche, and Takeda. He  
705 received conference support or speaker's fee by Janssen, Medice and Takeda. He received  
706 royalties from Hogrefe, Kohlhammer, CIP Medien, Oxford University Press; the present  
707 work is unrelated to these relationships. Dr Poustka served in an advisory or consultancy role  
708 for Roche and Viforpharm and received speaker's fee by Shire. She received royalties from  
709 Hogrefe, Kohlhammer and Schattauer. The present work is unrelated to the above grants and  
710 relationships. The other authors report no biomedical financial interests or potential conflicts  
711 of interest.



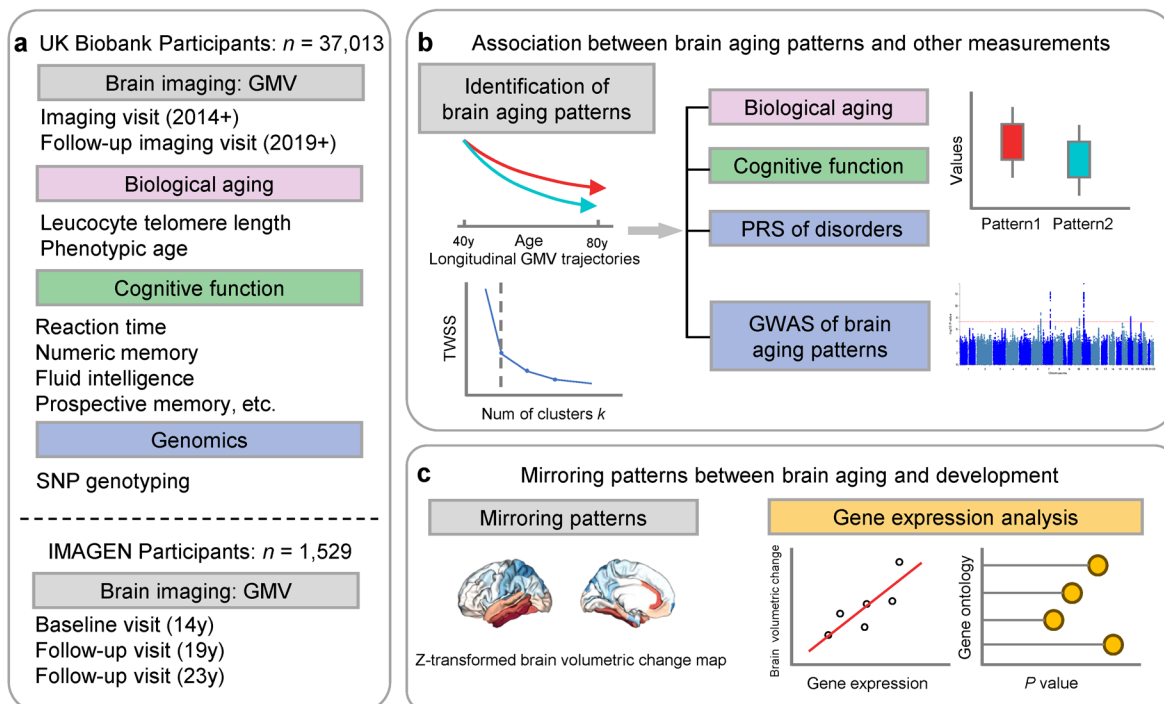

**Figure 1. Overview of the study workflow.** a, Population cohorts (UK Biobank and IMAGEN) and data sources (brain imaging, biological aging biomarkers, cognitive functions, genomic data) involved in this study. b, Brain aging patterns were identified using longitudinal trajectories of the whole brain GMV, which enabled the capturing of long-term and individualized variations compared to only use cross-sectional data, and associations between brain aging patterns and other measurements (biological aging, cognitive functions and PRS of major neuropsychiatric disorders) were investigated. c, Mirroring patterns between brain aging and brain development was investigated using z-transformed brain volumetric change map and gene expression analysis.

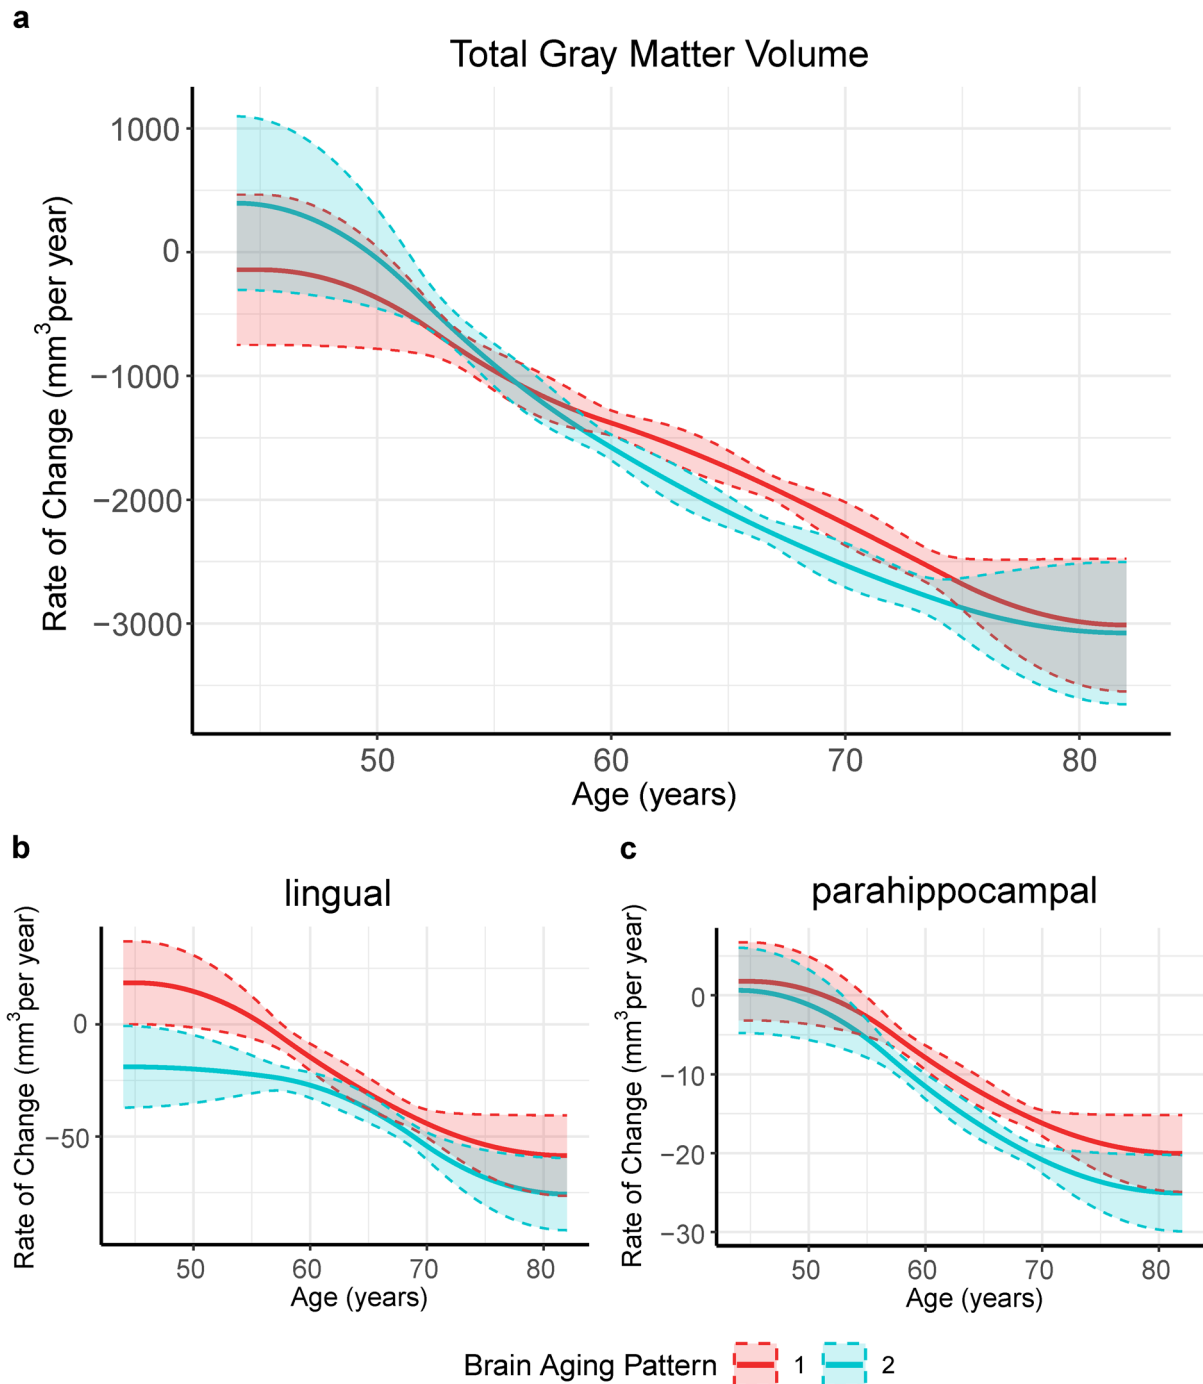

**Figure 2. Global (a) and selected regional (b, c) cortical gray matter volume rate of change among participants with brain aging patterns 1 (red) and 2 (blue).** Rates of volumetric change for total gray matter and each ROI were estimated using GAMM, which incorporates both cross-sectional between-subject variation and longitudinal within-subject variation from 40,921 observations and 37,013 participants. Covariates include sex, assessment center, handedness, ethnic, and ICV. Shaded areas around the fit line denotes 95% CI.

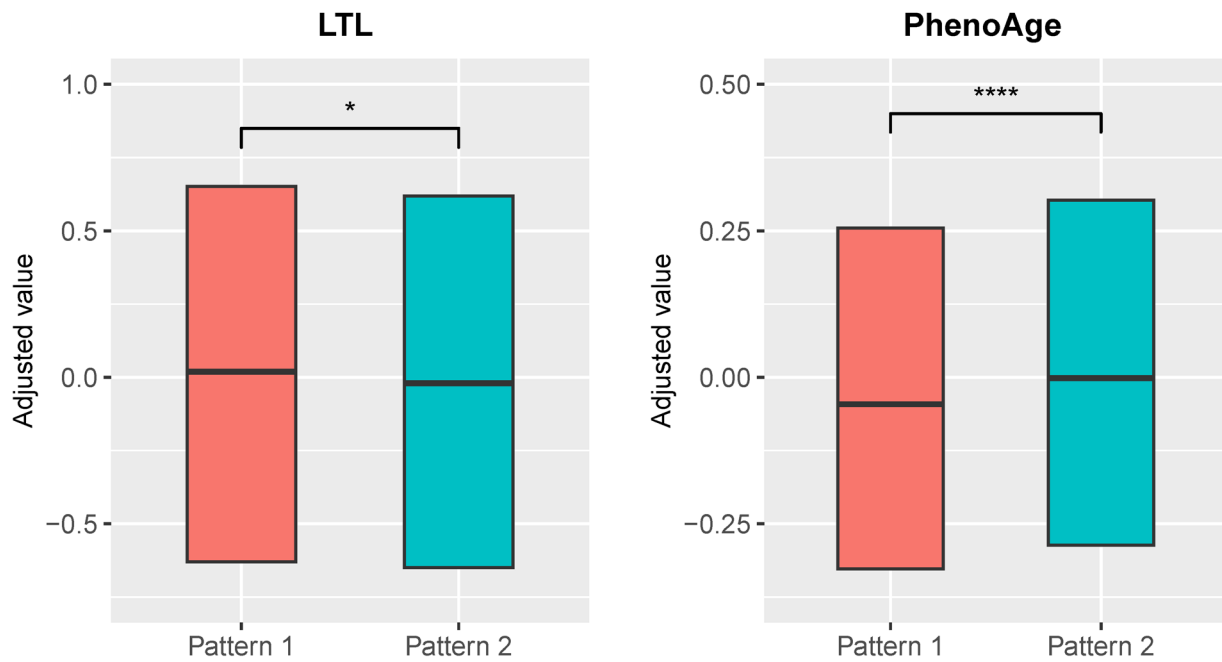

**Figure 3. Distributions of biological aging biomarkers (leucocyte telomere length (LTL) and PhenoAge) among participants with brain aging patterns 1 and 2.** Boxes represent the interquartile range (IQR), lines within the boxes indicate the median. Two-sided P values were obtained by comparing LTL or PhenoAge<sup>19</sup> between brain aging patterns using unadjusted multivariate linear regression models. Results remained significant when adjusting for sex, age, ethnic, BMI, smoking status and alcohol intake frequency in the LTL model<sup>20</sup> and sex, age, ethnic, BMI, smoking status, alcohol frequency and education years in PhenoAge model. Stars indicate statistical significance after Bonferroni correction. \*\*\*\*:  $p \leq 0.0001$ , \*:  $p \leq 0.05$ .

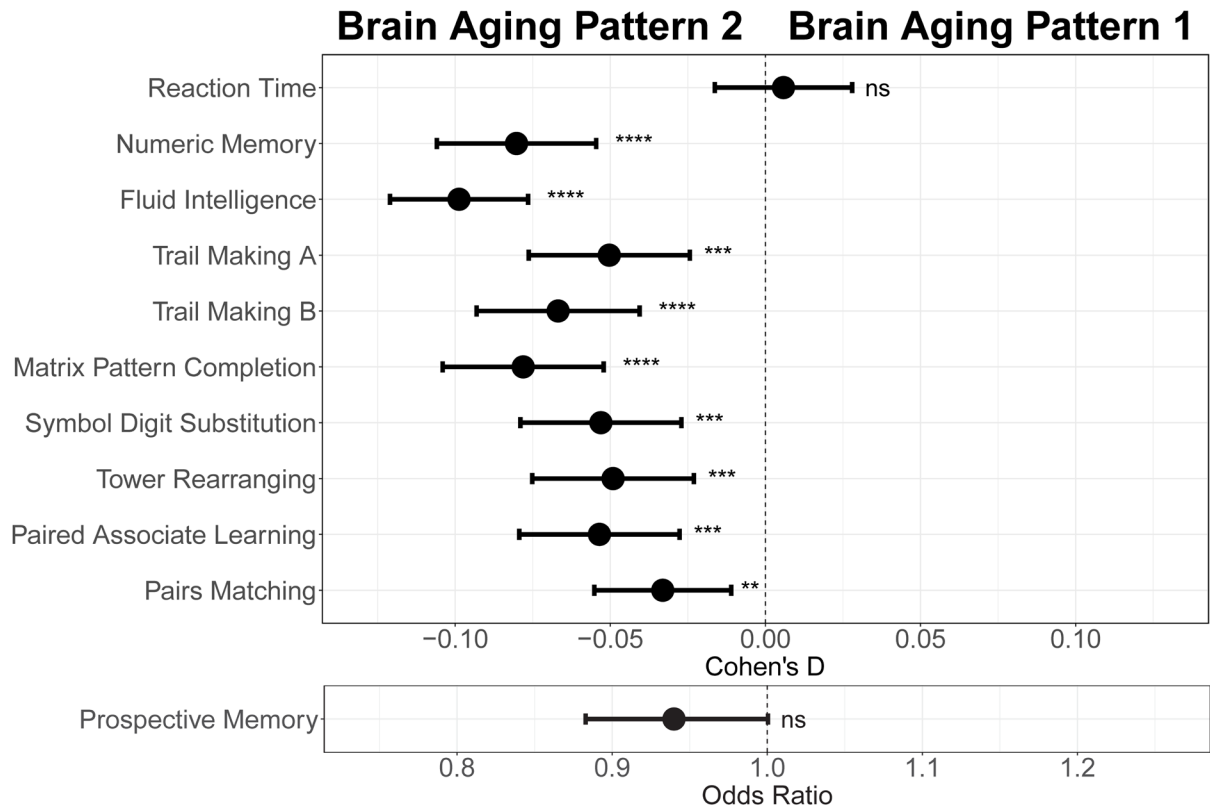

**Figure 4. Effect size (Cohen's D or odds ratio) for comparing the cognitive functions between participants with brain aging patterns 1 and 2.** Results were adjusted such that negative Cohen's D and Odds Ratio less than 1 indicate worse cognitive performances in brain aging pattern 2 compared to pattern 1. Width of the lines extending from the center point represent 95% confidence interval. Two-sided P values were obtained using both unadjusted and adjusted (for sex, age, and TDI, education and income) multivariate regression models. Stars indicate statistical significance after FDR correction for 11 comparisons. \*\*\*\*:  $p \leq 0.0001$ , \*\*\*:  $p \leq 0.001$ , \*\*:  $p \leq 0.01$ , ns:  $p > 0.05$ .

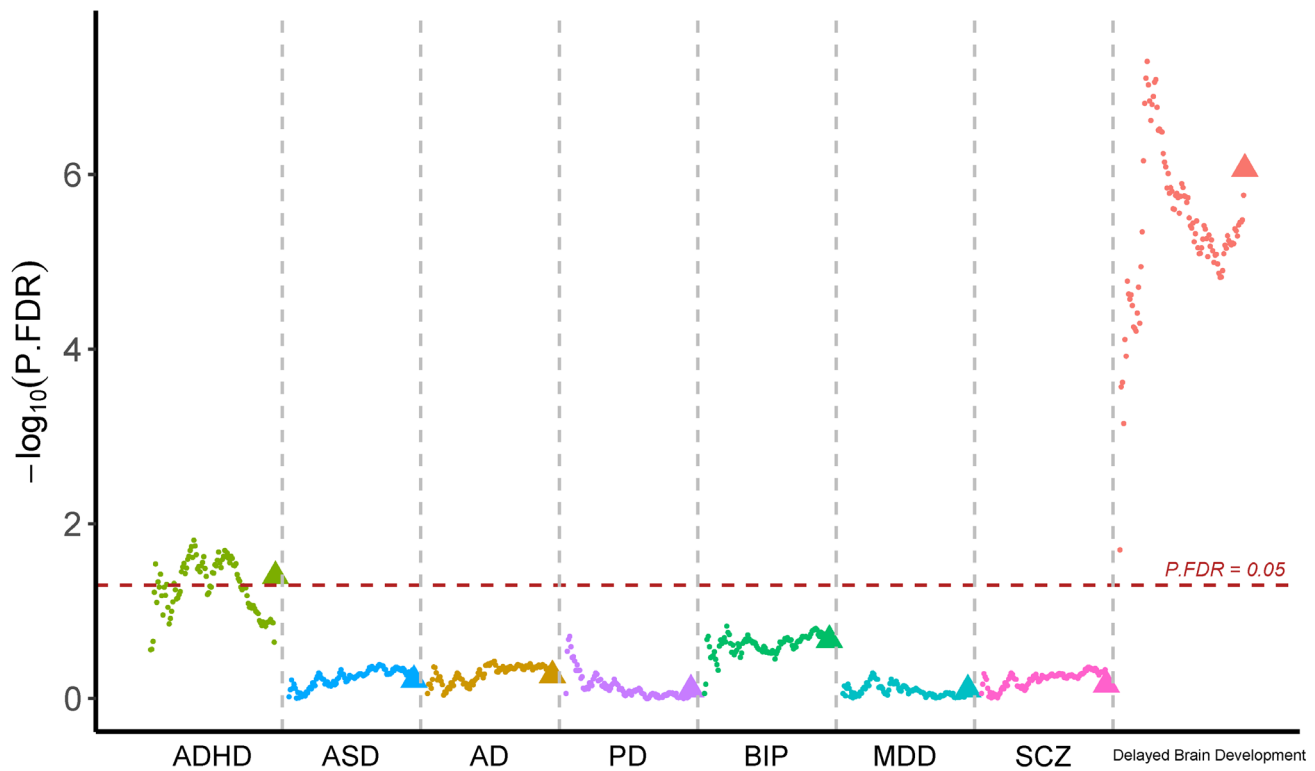

**Figure 5. Participants with accelerated brain aging (brain aging pattern 2) had significantly increased genetic liability to ADHD and delayed brain development.** Polygenic risk score (PRS) for ADHD, ASD, AD, PD, BIP, MDD, SCZ and delayed brain development (unpublished GWAS) were calculated at different p-value thresholds from 0.005 to 0.5 at an interval of 0.005. Vertical axis represents negative logarithm of P values comparing PRS in brain aging pattern 2 relative to pattern 1. Red horizontal dashed line indicates FDR corrected P value of 0.05. Colors represent traits and dots within the same color represent different p value thresholds. The trigonometric symbol indicates the average PRS across all p-value thresholds for the same trait.

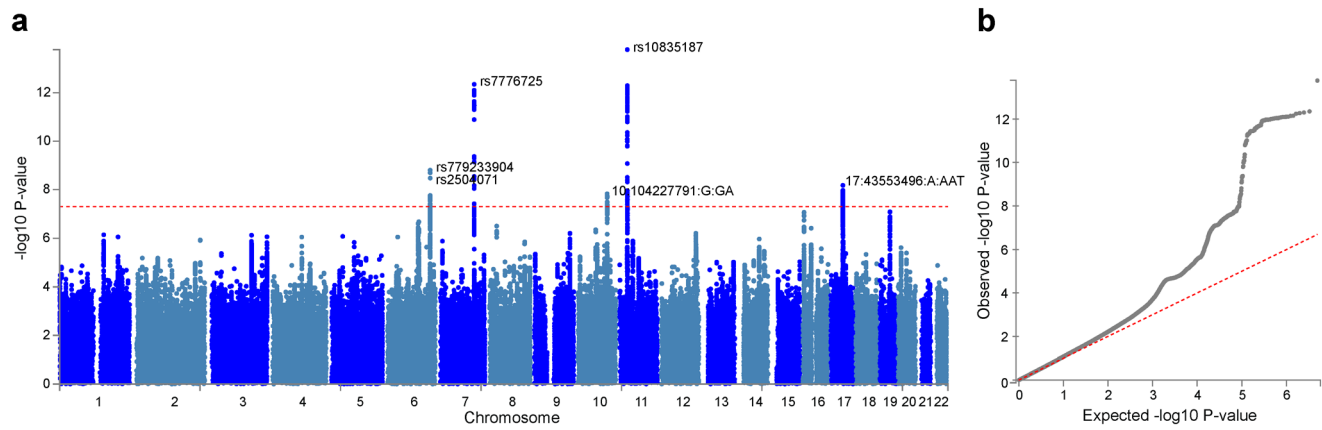

**Figure 6. Genome-wide association study (GWAS) identified 6 independent SNPs associated with accelerated brain aging.** Total GMV at 60 years old was estimated for each participant using mixed effect models allowing for individualized baseline GMV and GMV change rate, and was used as the phenotype in the GWAS. **a**, At genome-wide significance level ( $P = 5 \times 10^{-8}$ , red dashed line), rs10835187 and rs7776725 loci were identified to be associated with accelerated brain aging. **b**, Quantile–quantile plot showed that the most significant P values deviate from the null, suggesting that results are not unduly inflated.

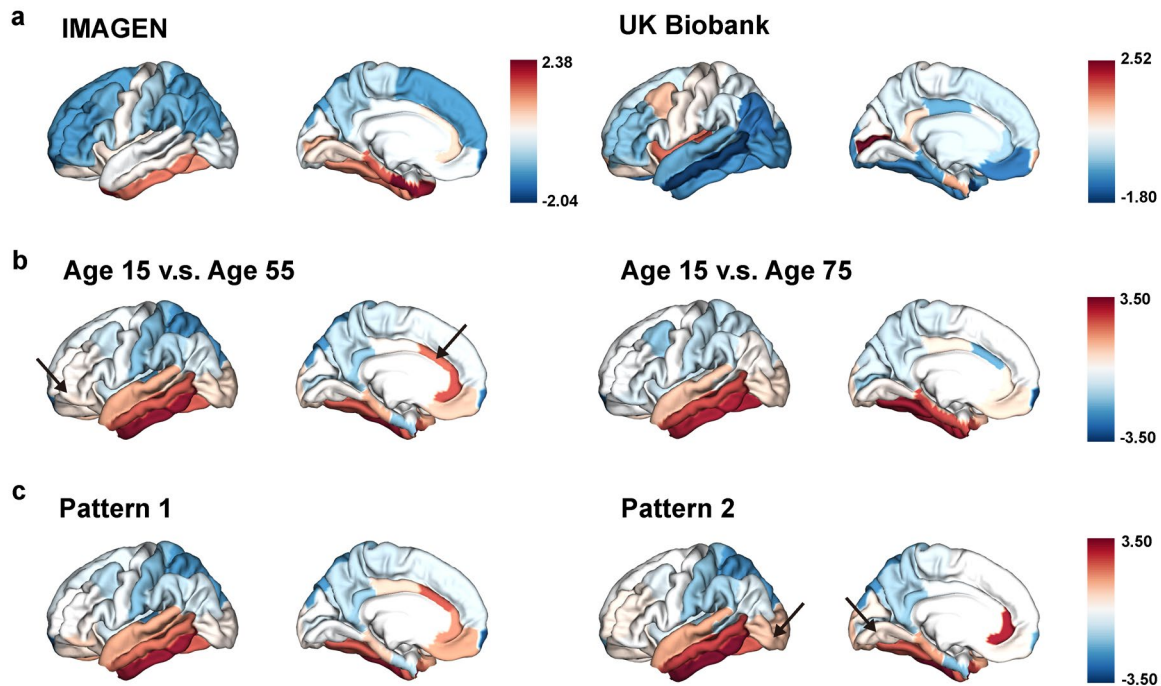

**Figure 7. The “last in, first out” mirroring patterns between brain development and brain aging.** **a**, The annual percentage volume change (APC) was calculated for each ROI and standardized across the whole brain in adolescents (IMAGEN, left) and mid-to-late aged adults (UK Biobank, right), respectively. For adolescents, ROIs in red indicate delayed structural brain development, while for mid-to-late aged adults, ROIs in blue indicate accelerated structural brain aging. **b**, Estimated APC in brain development versus early aging (55 years old, left), and versus late aging (75 years old, right). ROIs in red indicate faster GMV decrease during brain aging and slower GMV decrease during brain development, i.e., stronger mirroring effects between brain development and brain aging. **c**, Mirroring patterns between brain development and brain aging were more manifested in participants with accelerated aging (brain aging pattern 2). The arrows point to ROIs with more pronounced mirroring patterns in each subfigure.

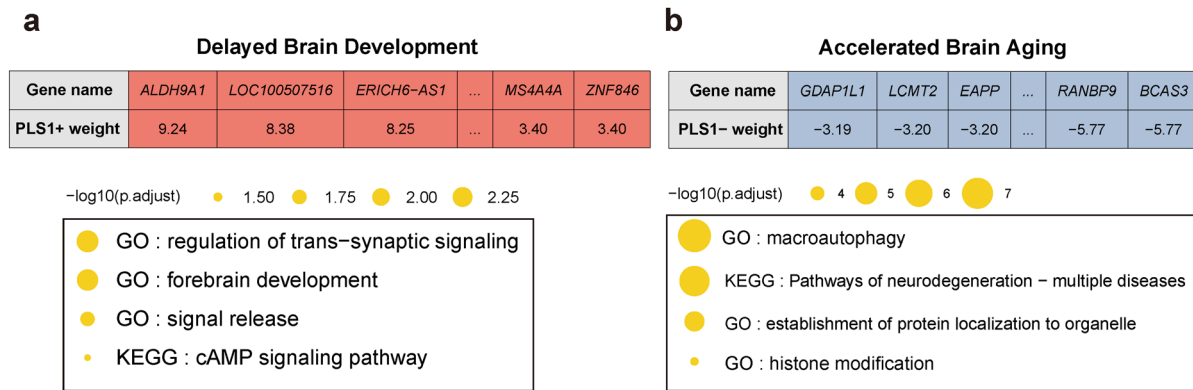

**Figure 8. Functional enrichment of gene transcripts significantly associated with delayed brain development and accelerated brain aging.** **a**, 990 genes were spatially correlated with the first PLS component of delayed structural brain development, and were enriched for trans-synaptic signal regulation, forebrain development, signal release and cAMP signaling pathway. **b**, 2,293 genes were spatially correlated the first PLS component of accelerated structural brain aging, and were enriched for macroautophagy, pathways of neurodegeneration, establishment of protein localization to organelle and histone modification. Size of the circle represents number of genes in each term and P values were corrected using FDR for multiple comparisons.
